# Supplementary material
Source: PubMed Central journal article supplement (PMC5905335)
Supplement: NIHMS956817-supplement-Supplemental_Table_S1.pdf [file NIHMS956817-supplement-Supplemental_Table_S1.pdf]

## SUPPLEMENTARY DATA

**Supplementary Table S1.** Dose-response and exposure-response parameters.

| Talazoparib parameter          | A <sub>0</sub> | I <sub>max</sub> | ID <sub>50</sub> /IAUC <sub>50</sub> | h     |
|--------------------------------|----------------|------------------|--------------------------------------|-------|
| Dose (mg)                      | 300            | 0.950            | 0.0331                               | 0.865 |
| AUC <sub>0-24</sub> (pg·hr/mL) | 242            | 0.978            | 19,000                               | 1.23  |

Abbreviations: A<sub>0</sub>, estimated baseline activity; AUC<sub>0-24</sub>, area under the plasma concentration-time curve from 0 to 24 h; ID<sub>50</sub>, inhibitory dose 50%; IAUC<sub>50</sub>, area under the curve at 50% of inhibition; I<sub>max</sub>, maximum inhibitory effect; PARP, poly(ADP-ribose) polymerase; PBMC, peripheral blood mononuclear cell.

As illustrated in the dose-response curve, a fair degree of variability was observed across patients at doses of 0.4 mg/day and below, with near complete inhibition being achieved in one patient at 0.1 mg/day and all three patients at 0.2 mg/day dose levels, while two of the three patients at the 0.4 mg/day dose level showed little inhibition. PBMC PARP inhibition was consistently inhibited across all patients at doses of 0.6 mg/day and above with an IC<sub>50</sub> of 0.0331 mg/day.
